# Supplementary material for: Molecular characterization of chronic cutaneous wounds reveals subregion‐ and wound type‐specific differential gene expression
Source: PubMed Central journal article supplement — Int Wound J. 2023 Dec 27;21(4):e14447. doi: 10.1111/iwj.14447 (PMC10958103; doi:10.1111/iwj.14447), 2023-12-27

# Supplementary Figure 1

**A**

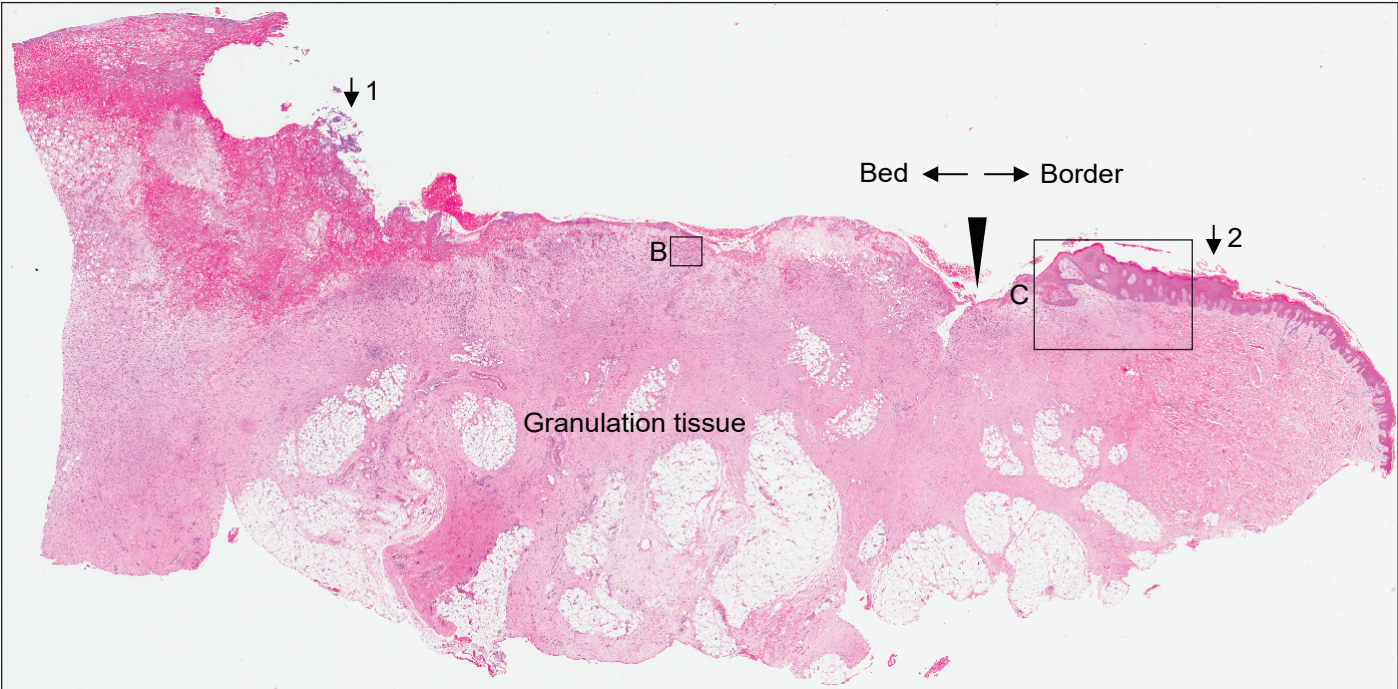

**B**

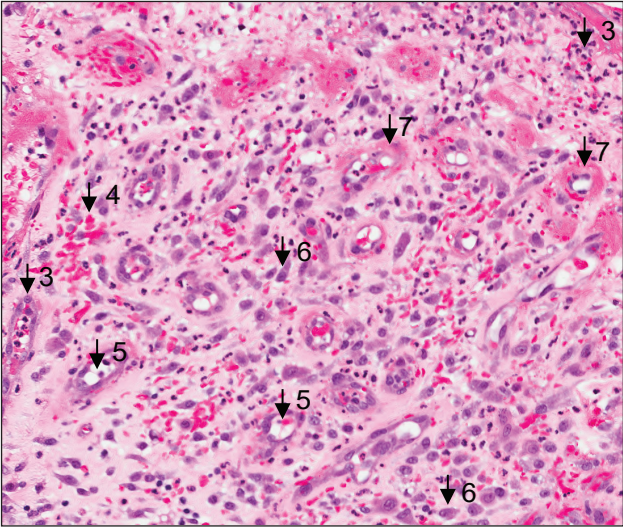

**C**

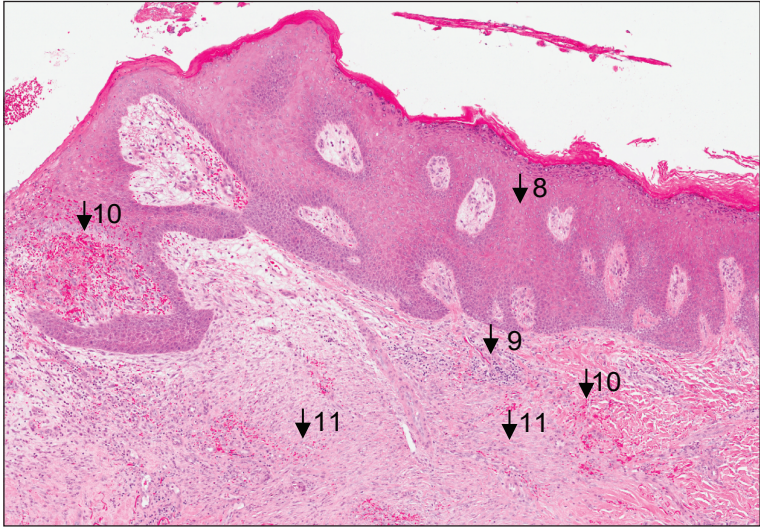



# Supplementary Figure 2

Ki67

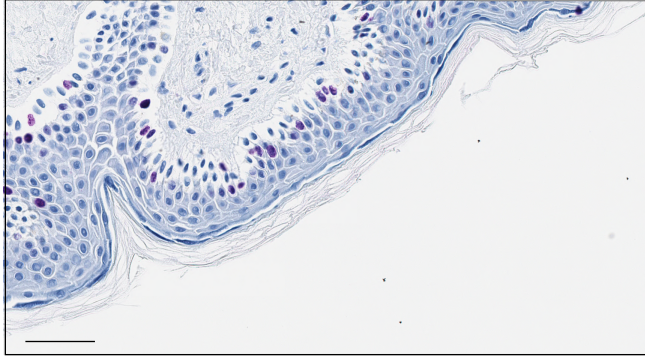

Overlay Ki67+ nuclei

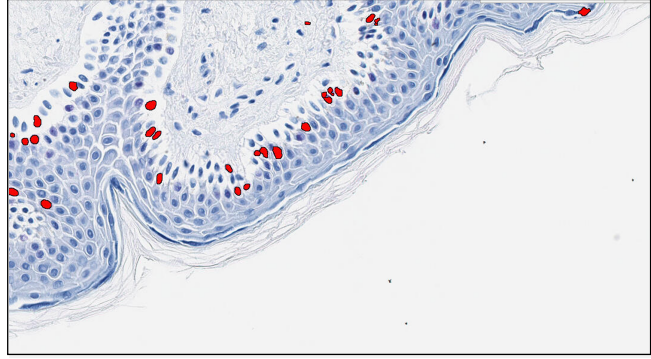

CD31

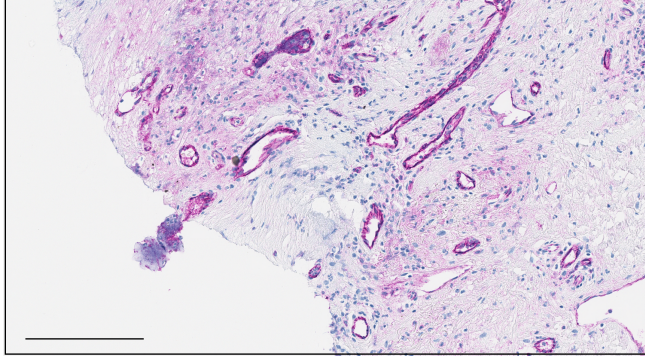

Overlay CD31+ area

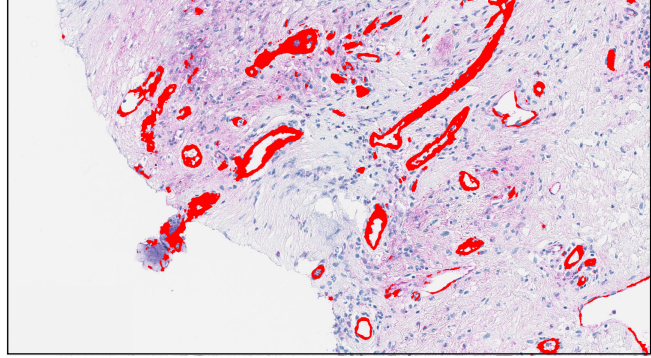

KRT5

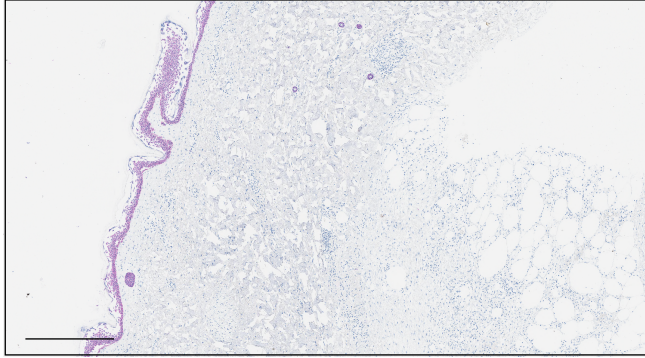

Overlay KRT5+ area

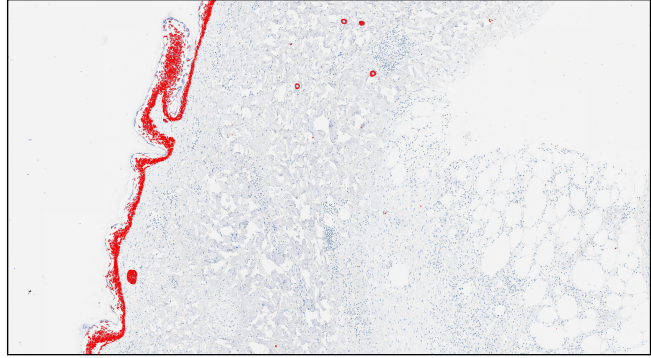

MPO

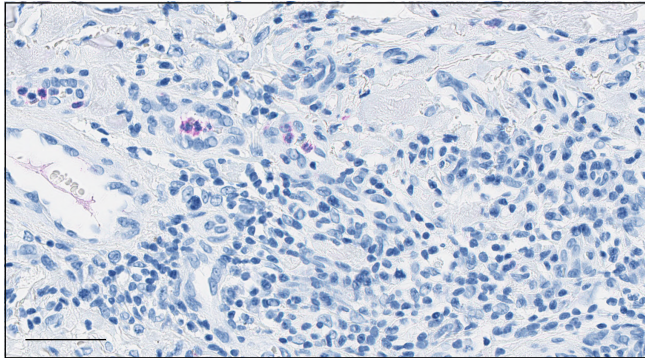

Overlay MPO+ area

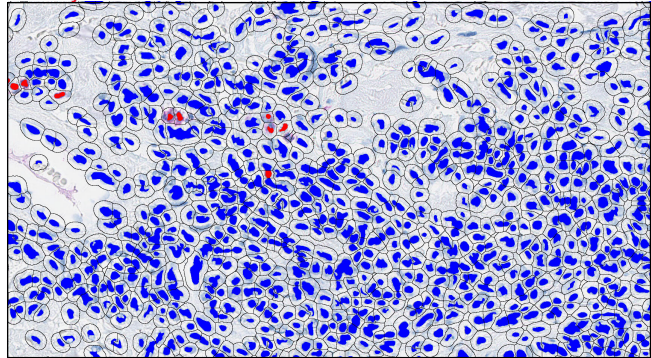



# Supplementary Figure 3

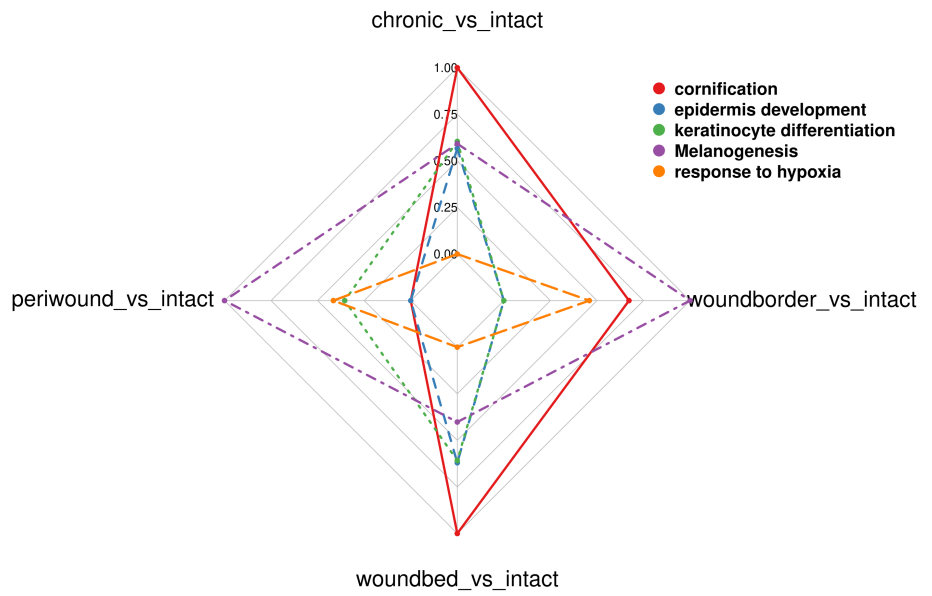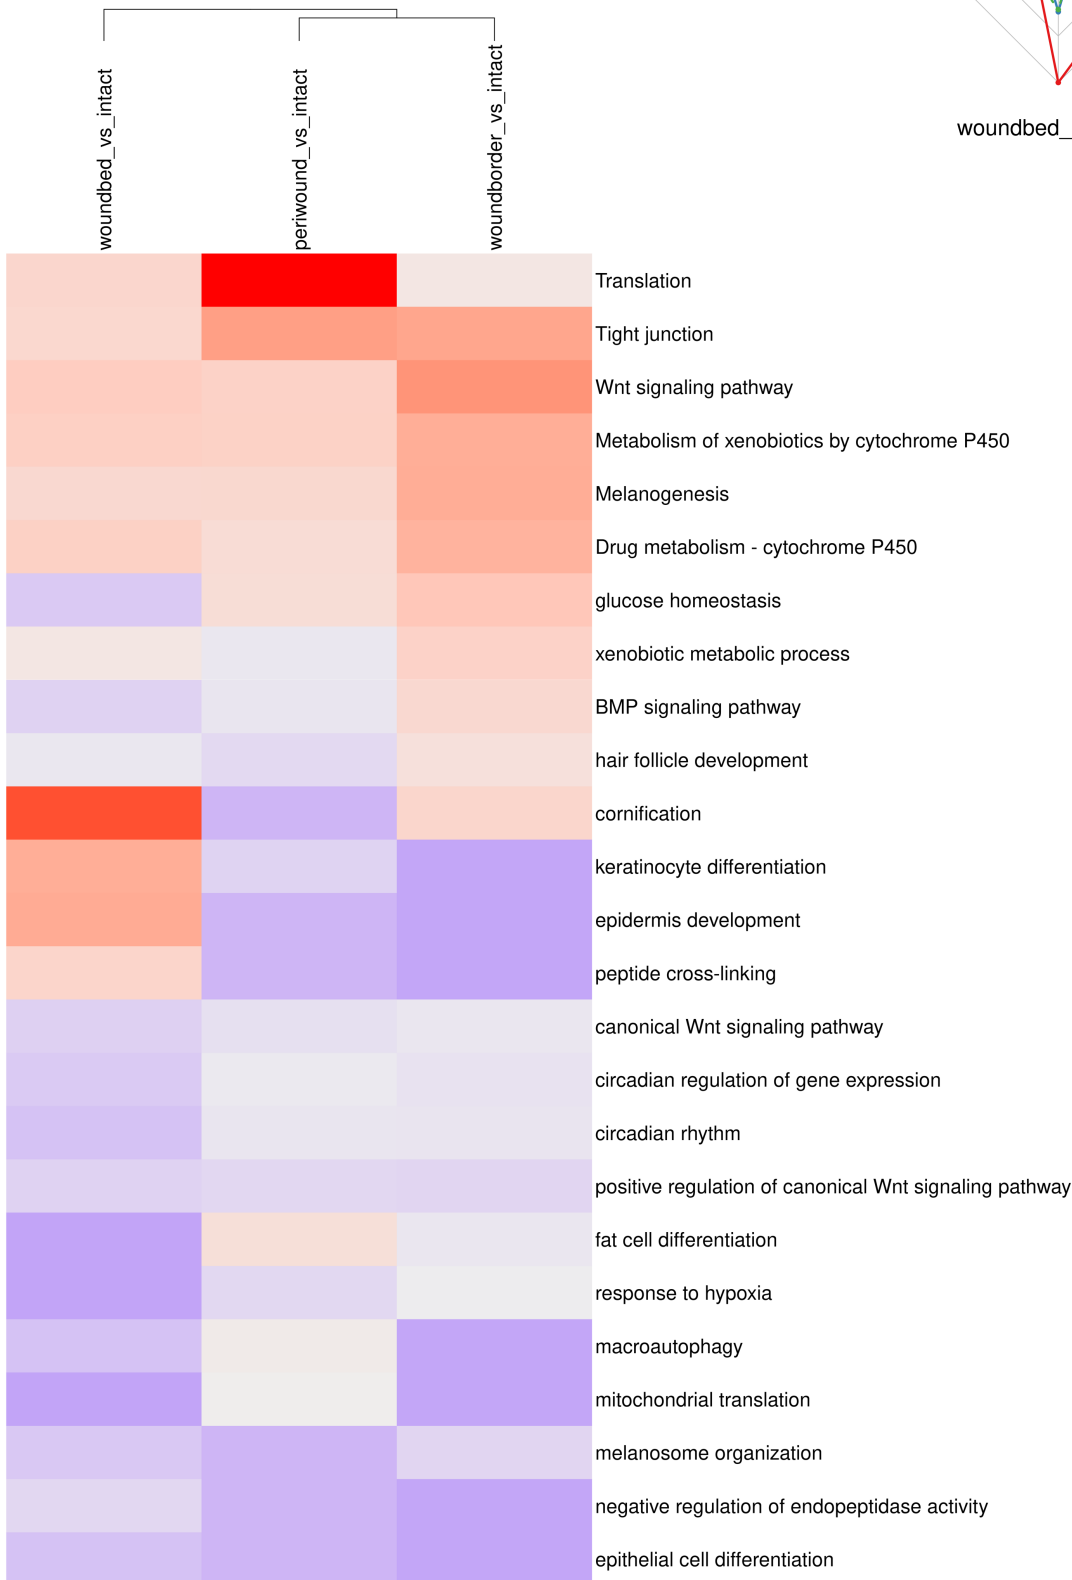

## Pathway enrichment

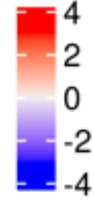



# Supplementary Figure 4A

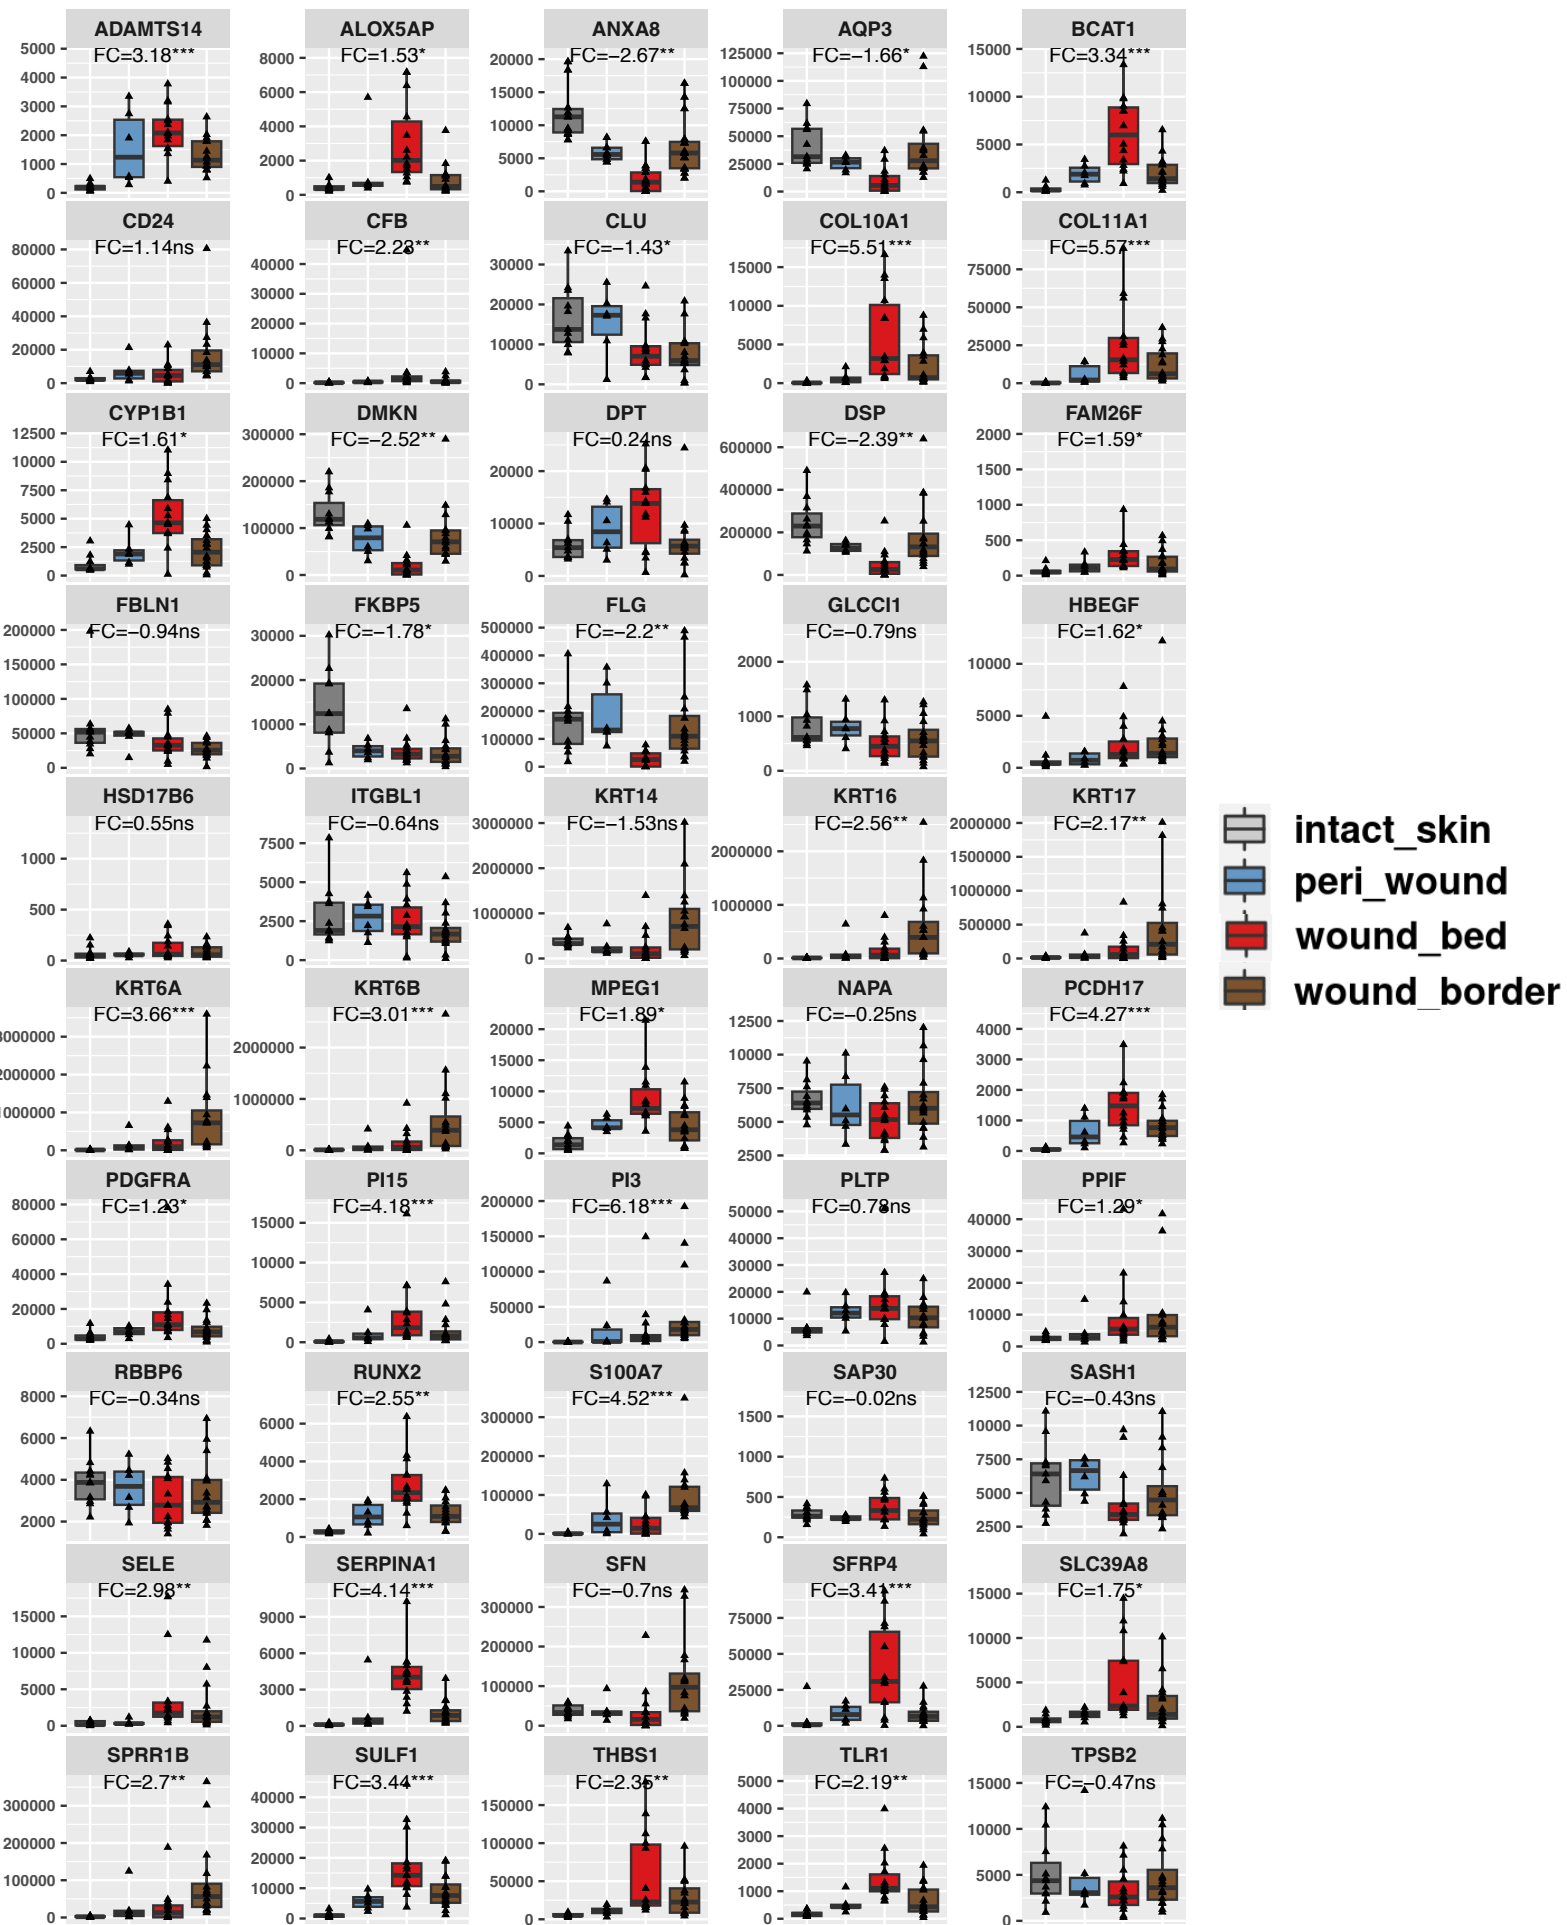



# Supplementary Figure 4B

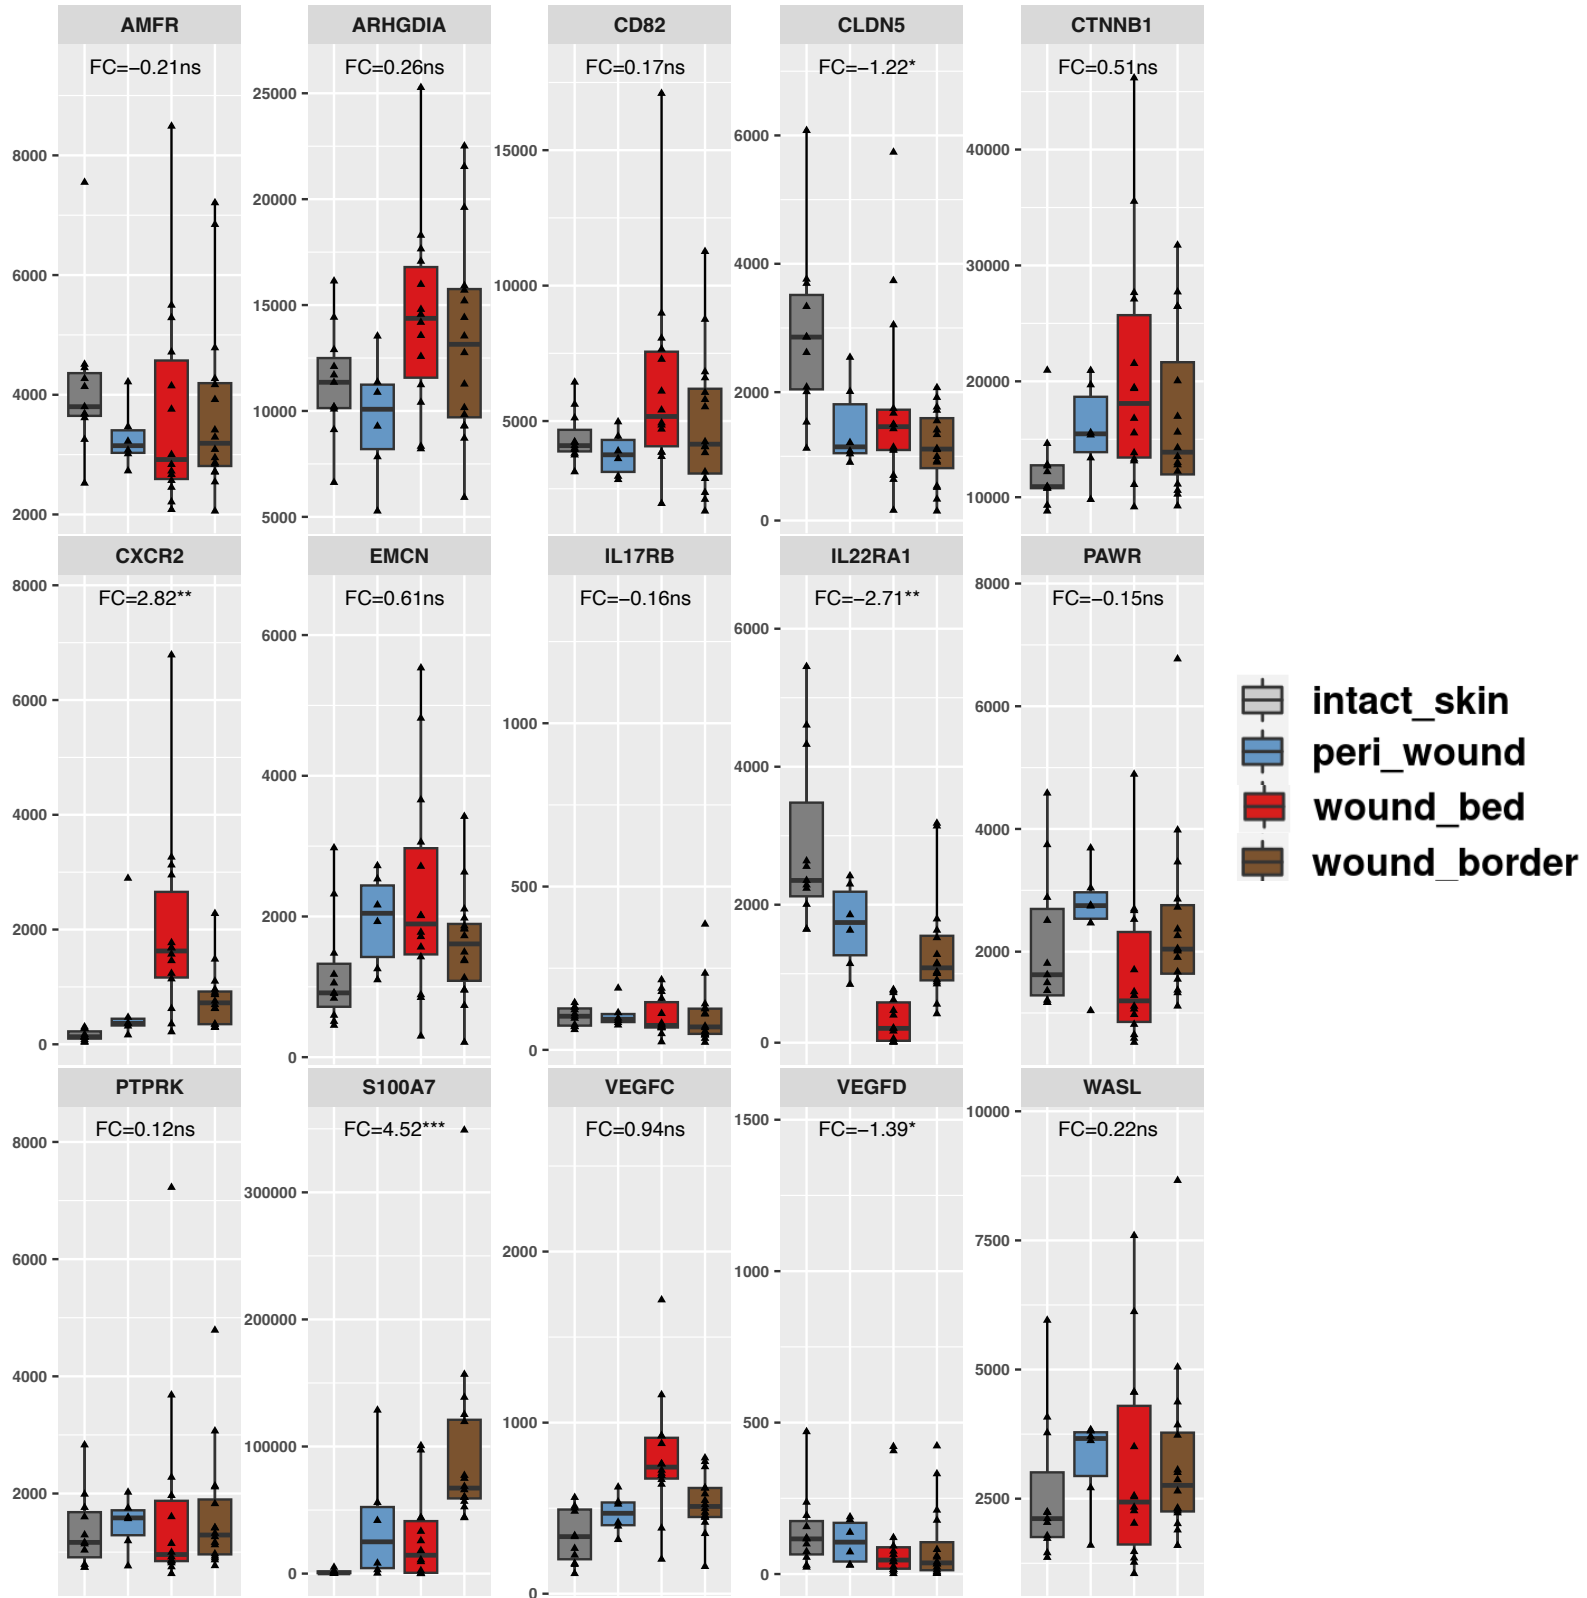

Supplement: IWJ-21-e14447-s002.pdf [file IWJ-21-e14447-s002.pdf]
