# Supplementary material for: Molecular characterization of chronic cutaneous wounds reveals subregion‐ and wound type‐specific differential gene expression
Source: PubMed Central journal article supplement — Int Wound J. 2023 Dec 27;21(4):e14447. doi: 10.1111/iwj.14447 (PMC10958103; doi:10.1111/iwj.14447), 2023-12-27
Supplement: IWJ-21-e14447-s001.pdf [file IWJ-21-e14447-s001.pdf]

Supplementary Table 1

| Wound type / Intact skin | Patient | Gender | Race  | Age (years) | Disease |    |    |    |    |    |    |    |    |    |    | Anatomical location | Vis                     | Ulcer size (cm) | Ulcer stage | Wound age (years) | Wound subregion |     |        | Intact |      |  |
|--------------------------|---------|--------|-------|-------------|---------|----|----|----|----|----|----|----|----|----|----|---------------------|-------------------------|-----------------|-------------|-------------------|-----------------|-----|--------|--------|------|--|
|                          |         |        |       |             | CV      | HT | PD | RD | SA | ND | SD | DB | GI | CA | OD |                     |                         |                 |             |                   | DA              | Bed | Border |        | Peri |  |
| LU                       | 50023   | M      | Cauc. | 64          | 1       |    |    |    |    |    | 1  |    |    |    |    | 1                   | Malleolus medialis      | V2              | 7           | 3                 | >3 ; <5         | 0   | 4      | 0      |      |  |
|                          | 50037   | M      | Cauc. | 61          | 1       | 1  |    |    |    |    |    |    |    |    |    |                     | Leg                     | V1              | 4x3         | 2-3               | <2              | 4   | 4      | 0      |      |  |
|                          | 50040   | M      | Cauc. | 70          | 1       |    |    | 1  |    | 1  | 1  |    |    |    |    |                     | Leg                     | V1              | 15          | 3                 | <2              | 4   | 0      | 4      |      |  |
|                          | 50046   | M      | NS    | 34          |         |    |    |    |    |    |    |    |    |    |    |                     | Leg                     | V1              | 10x12       | 3                 | >3 ; <5         | 2   | 0      | 0      |      |  |
| FU                       | 50052   | F      | Cauc. | 56          |         |    |    |    | 1  |    |    |    |    |    |    | 1                   | Leg                     | V2              | 8x8         | 3                 | >3 ; <5         | 0   | 1      | 0      |      |  |
|                          | 50002   | F      | Cauc. | 43          |         |    |    |    |    |    |    |    |    |    |    |                     | Foot, right             | V1              | 3           | 3                 | <2              | 3   | 7      | 0      |      |  |
|                          | 50038   | M      | Cauc. | 61          | 1       | 1  |    |    |    | 1  |    |    |    |    |    |                     | Foot and heel           | V1              | 10x6        | 3                 | <2              | 3   | 0      | 0      |      |  |
| PU                       | 50007   | M      | Cauc. | 36          |         |    |    |    |    |    | 1  |    |    |    |    | 1                   | Back thoracic           | V1              | 8           | 4                 | <1              | 3   | 2      | 0      |      |  |
|                          | 50013   | F      | NS    | 45          |         |    |    |    |    | 1  |    |    |    |    |    |                     | Trochanter major, right | V1              | 3x2         | 4                 | <1              | 3   | 1      | 0      |      |  |
|                          | 50021   | F      | Cauc. | 91          | 1       | 1  |    | 1  |    | 1  |    |    |    |    |    |                     | Sacrum                  | V1              | 4x4         | 4                 | <1              | 4   | 4      | 2      |      |  |
|                          | 50025   | F      | Cauc. | 57          |         | 1  |    |    |    | 1  |    |    |    |    |    |                     | Trochanter, gluteus     | V1              | 7x6         | 3                 | <1              | 9   | 3      | 4      |      |  |
|                          | 50029   | F      | Cauc. | 84          | 1       | 1  | 1  |    | 1  | 1  |    |    |    |    |    | 1                   | Sacrum                  | V2              | 10x6        | 4                 | <1              | 4   | 0      | 0      |      |  |
|                          | 50036   | M      | Cauc. | 64          | 1       | 1  |    |    |    |    |    |    |    |    |    |                     | Thigh, posterior flap   | V1              | 6x1         | 2                 | <1              | 0   | 9      | 3      |      |  |
|                          | 50041   | M      | Cauc. | 89          | 1       | 1  |    | 1  |    | 1  |    |    |    |    |    |                     | Leg                     | V1              | 10x10       | 4                 | <1              | 6   | 6      | 0      |      |  |
|                          | 50048   | F      | Cauc. | 72          |         |    |    |    |    | 1  |    |    |    |    |    |                     |                         | Sacrum          | V1          | 7x4               | 3               | <1  | 0      | 3      | 0    |  |
| WHC                      | 50051   | F      | Cauc. | 75          | 1       |    | 1  |    |    |    | 1  |    |    |    |    | 1                   | Sacrum                  | V1              | 10          | 3                 | <1              | 2   | 2      | 0      |      |  |
|                          | 50015   | F      | Cauc. | 41          |         |    |    |    |    |    |    |    |    |    |    |                     | Abdomen                 | V1              | NA          | NA                | <1              | 1   | 2      | 2      |      |  |
|                          | 50030   | M      | Cauc. | 63          |         |    | 1  |    |    |    |    |    |    |    |    |                     | Abdomen                 | V2              | NA          | NA                | <1              | 0   | 0      | 2      |      |  |
|                          | 50032   | F      | Cauc. | 46          |         |    |    |    |    |    |    |    |    |    |    |                     | Abdomen                 | V1              | 3x3         | NA                | <1              | 4   | 4      | 0      |      |  |
|                          | 50033   | F      | Cauc. | 89          | 1       |    |    |    |    |    | 1  |    |    |    |    |                     | Abdomen                 | V1              | NA          | NA                | <2              | 0   | 6      | 0      |      |  |
|                          | 50049   | M      | Cauc. | 33          |         |    |    |    |    |    |    |    |    |    |    |                     | Abdomen, upper          | V1              | 8           | NA                | <1              | 2   | 1      | 0      |      |  |
| Intact                   | 00002   | F      | Asian | 56          |         |    |    |    |    |    |    |    |    |    |    | 1                   | Elbow                   | V1              | 4x5         | 4                 | <1              | 0   | 4      | 0      |      |  |
|                          | 00082   | F      | Cauc. | 60          |         |    |    |    |    |    |    |    |    |    |    |                     | Abdomen                 | V2              | 4x5         | 4                 | <1              | 0   | 4      | 0      |      |  |
|                          | 00097   | F      | Cauc. | 66          |         |    |    |    |    |    |    |    |    |    |    |                     | Abdomen                 | V1              | NA          | NA                | <1              | 0   | 0      | 2      |      |  |
|                          | 00098   | M      | Cauc. | 54          |         |    |    |    |    |    | 1  |    |    |    |    |                     | Thigh                   | V1              | NA          | NA                | <1              | 4   | 4      | 0      |      |  |
|                          | 00099   | F      | Cauc. | 50          |         |    |    |    |    |    |    |    |    |    |    |                     | Abdomen                 | V1              | NA          | NA                | <1              | 0   | 0      | 2      |      |  |
|                          | 00100   | F      | Cauc. | 51          |         |    |    |    |    |    |    |    |    |    |    |                     | Thigh                   | V1              | NA          | NA                | <1              | 0   | 0      | 2      |      |  |
|                          | 00101   | F      | Cauc. | 64          |         |    |    |    |    |    |    |    |    |    |    |                     | Breast                  | V1              | NA          | NA                | <1              | 0   | 0      | 2      |      |  |
|                          | 00105   | F      | Cauc. | 58          |         |    |    |    |    |    |    |    |    |    |    |                     | 1                       | Breast          | V1          | NA                | NA              | <1  | 0      | 0      | 2    |  |
|                          | 00107   | F      | Cauc. | 37          |         |    |    |    |    |    |    |    |    |    |    |                     | 1                       | Breast          | V1          | NA                | NA              | <1  | 0      | 0      | 2    |  |
|                          | 00108   | F      | Cauc. | 51          |         |    |    |    |    |    |    |    |    |    |    |                     | 1                       | Abdomen         | V2          | NA                | NA              | <1  | 0      | 0      | 2    |  |
|                          | 01005   | F      | Cauc. | NA          |         |    |    |    |    |    |    |    |    |    |    |                     | 1                       | Breast          | V1          | NA                | NA              | <1  | 0      | 0      | 2    |  |
|                          |         |        |       |             |         |    |    |    |    |    |    |    |    |    |    |                     | 1                       | Thigh           | V1          | NA                | NA              | <1  | 0      | 0      | 2    |  |
